# Supplementary material for: Facile assembly of 2D α-zirconium phosphate supported silver nanoparticles: superior and recyclable catalysis
Source: Royal Society of Chemistry journal article supplement (doi:10.1039/d0nj01378a), 2020-01-01
Supplement: d0nj01378a1.pdf [file d0nj01378a1.pdf]

## Supplementary Information

### Facile assemble of 2D $\alpha$ -zirconium phosphate supported silver nanoparticles: superior and recyclable catalysis

Yonghang Xu<sup>a,†,\*</sup>, Fangya Zhou<sup>a,†</sup>, Min Chen<sup>a</sup>, Huawen Hu<sup>a</sup>, Limiao Lin<sup>b,\*</sup>, Jingshu Wu<sup>a</sup>, Min Zhang<sup>a</sup>

<sup>a</sup> *School of Materials Science and Energy Engineering, Foshan University, Foshan 528000, Guangdong, China*

<sup>b</sup> *School of Materials Science and Engineering, Sun Yat-sen University, Guangzhou 510275, Guangdong, China*

† These authors contributed equally to this work.

\*Corresponding authors: Yonghang Xu, Email: [yonghangxu@fosu.edu.cn](mailto:yonghangxu@fosu.edu.cn); Limiao Lin, Email: [linlmiao@mail2.sysu.edu.cn](mailto:linlmiao@mail2.sysu.edu.cn)

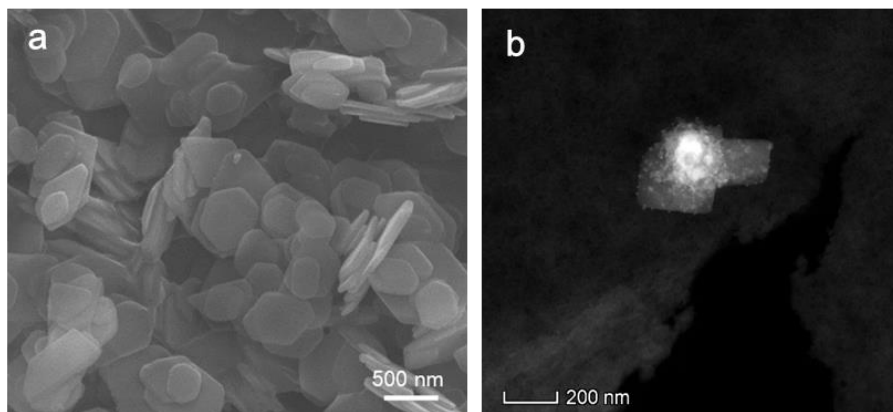

**Fig. S1.** (a) SEM image of ZrP microcrystals and (b) STEM image of ZrP@PDA/Ag

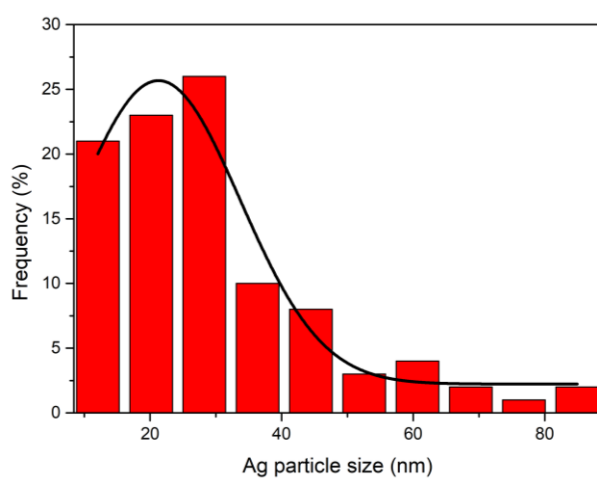

**Fig. S2.** Size distribution of AgNPs in the chosen area of Fig. 2b

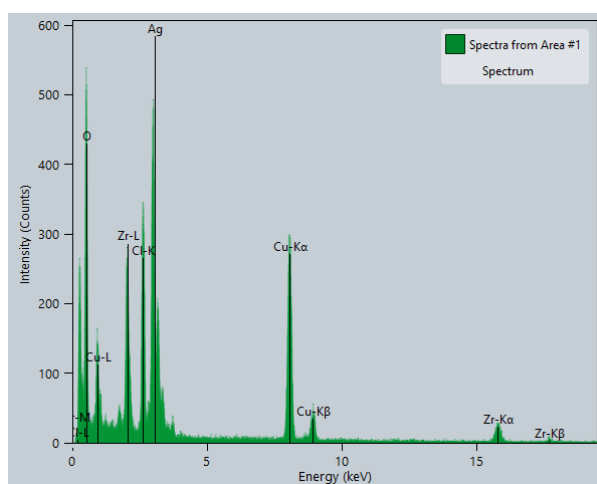

**Fig. S3.** Corresponding EDS spectrum of the HAADF image in Fig. 3d

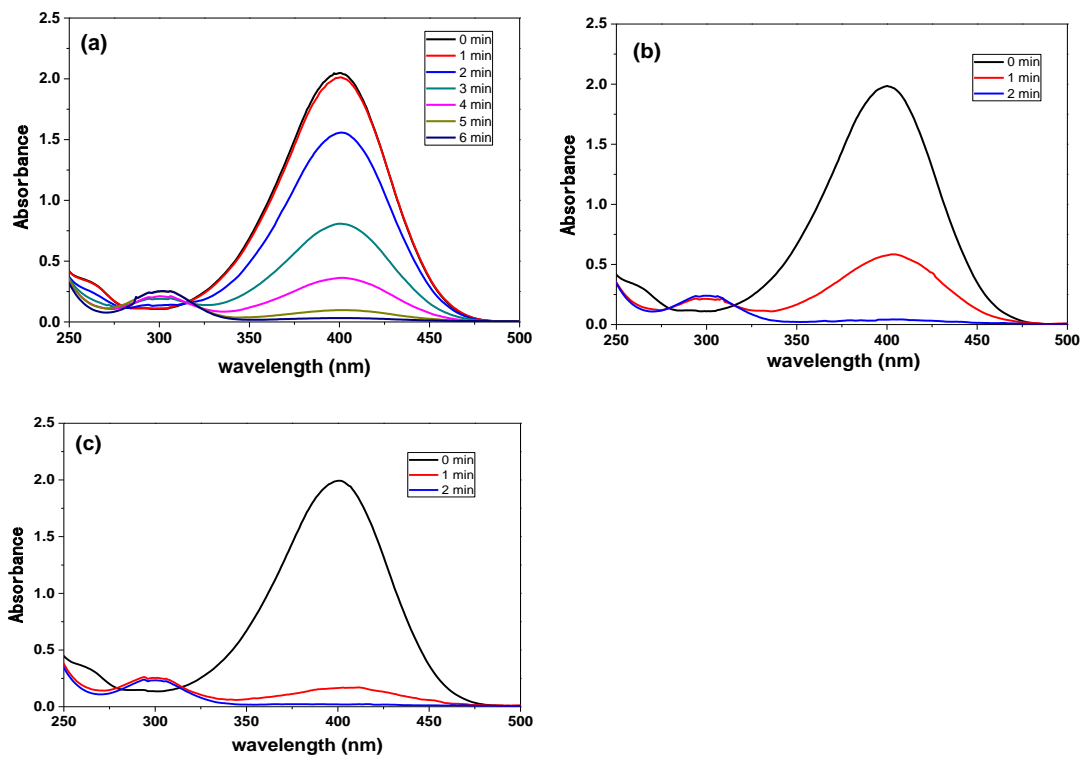

**Fig. S4.** UV-vis absorption spectra of the reduction of 4-NP to 4-AP with different concentrations of ZrP@PDA/Ag of (a) 0.0625  $\mu\text{g/mL}$ , (b) 0.1875  $\mu\text{g/mL}$  and (c) 0.25  $\mu\text{g/mL}$ . Conditions: 3 mL of 0.24 mM 4-NP, 3 mL of 76 mM  $\text{NaBH}_4$  and defined amount of Dispersion 2 were mixed, and 3 mL of the mixture was introduced into the cuvette.

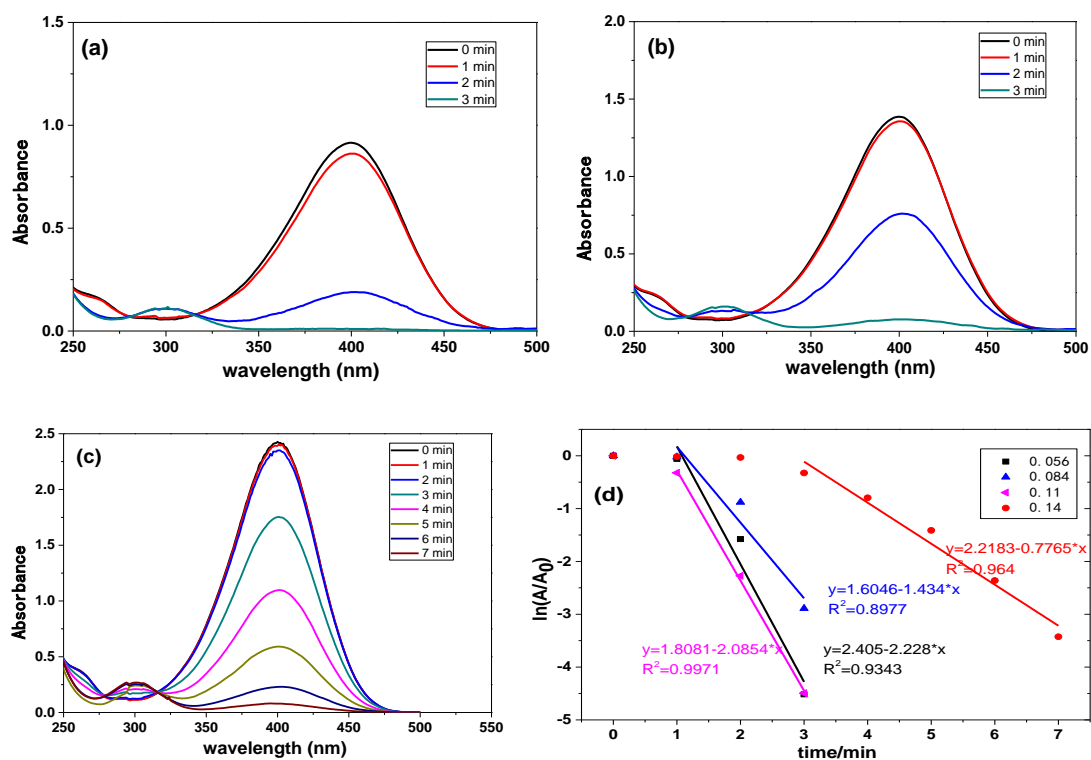

**Fig. S5.** UV-vis absorption spectra of the reduction of 4-NP to 4-AP with different initial contents of 4-NP of (a) 0.056 mM, (b) 0.084 μg/mL and (c) 0.14 μg/mL. (d) Plots of  $\ln(A_t/A_0)$  vs time with different 4-NP contents in the reaction solution. Conditions: 3 mL of aqueous 4-NP with given concentrations, 3 mL of 76 mM NaBH<sub>4</sub> and 400 μL of Dispersion 2 were mixed, and 3 mL of the mixture was introduced into the cuvette.

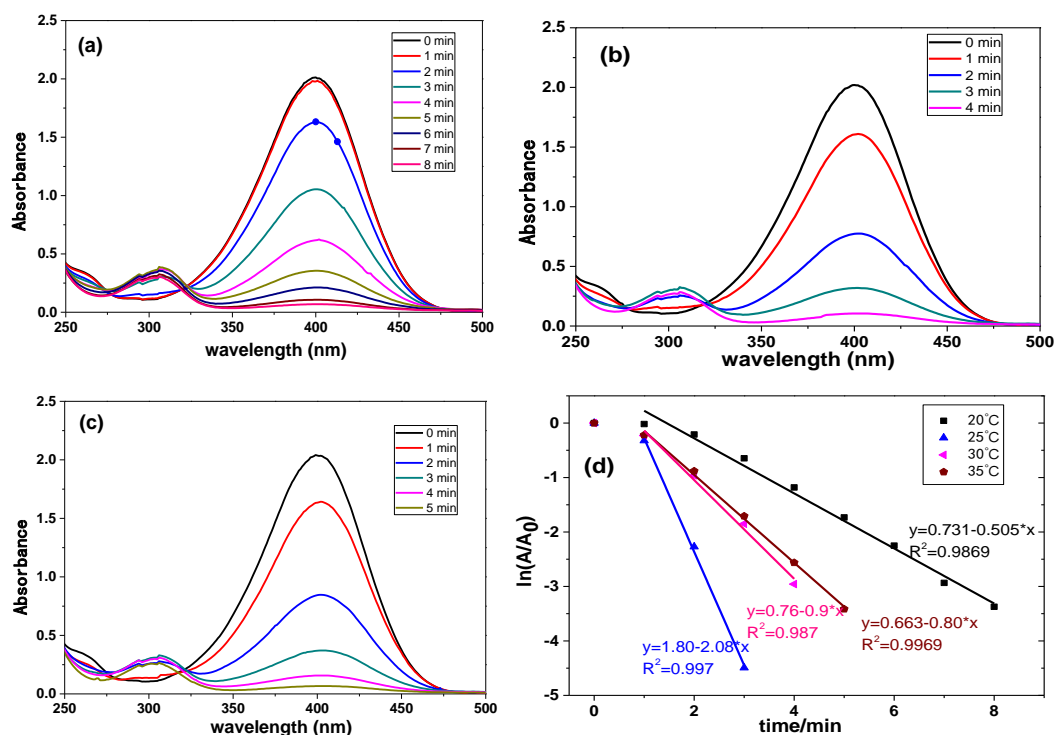

**Fig. S6.** UV-vis absorption spectra of the reduction of 4-NP to 4-AP at different reaction temperatures of (a) 20 °C, (b) 30 °C and (c) 35 °C. (d) Plots of  $\ln(A_t/A_0)$  vs time at different reaction temperatures. Conditions: 3 mL of 0.24 mM 4-NP, 3 mL of 76 mM  $\text{NaBH}_4$  and 400  $\mu\text{L}$  of Dispersion 2 were mixed, and 3 mL of the mixture was introduced into the cuvette.

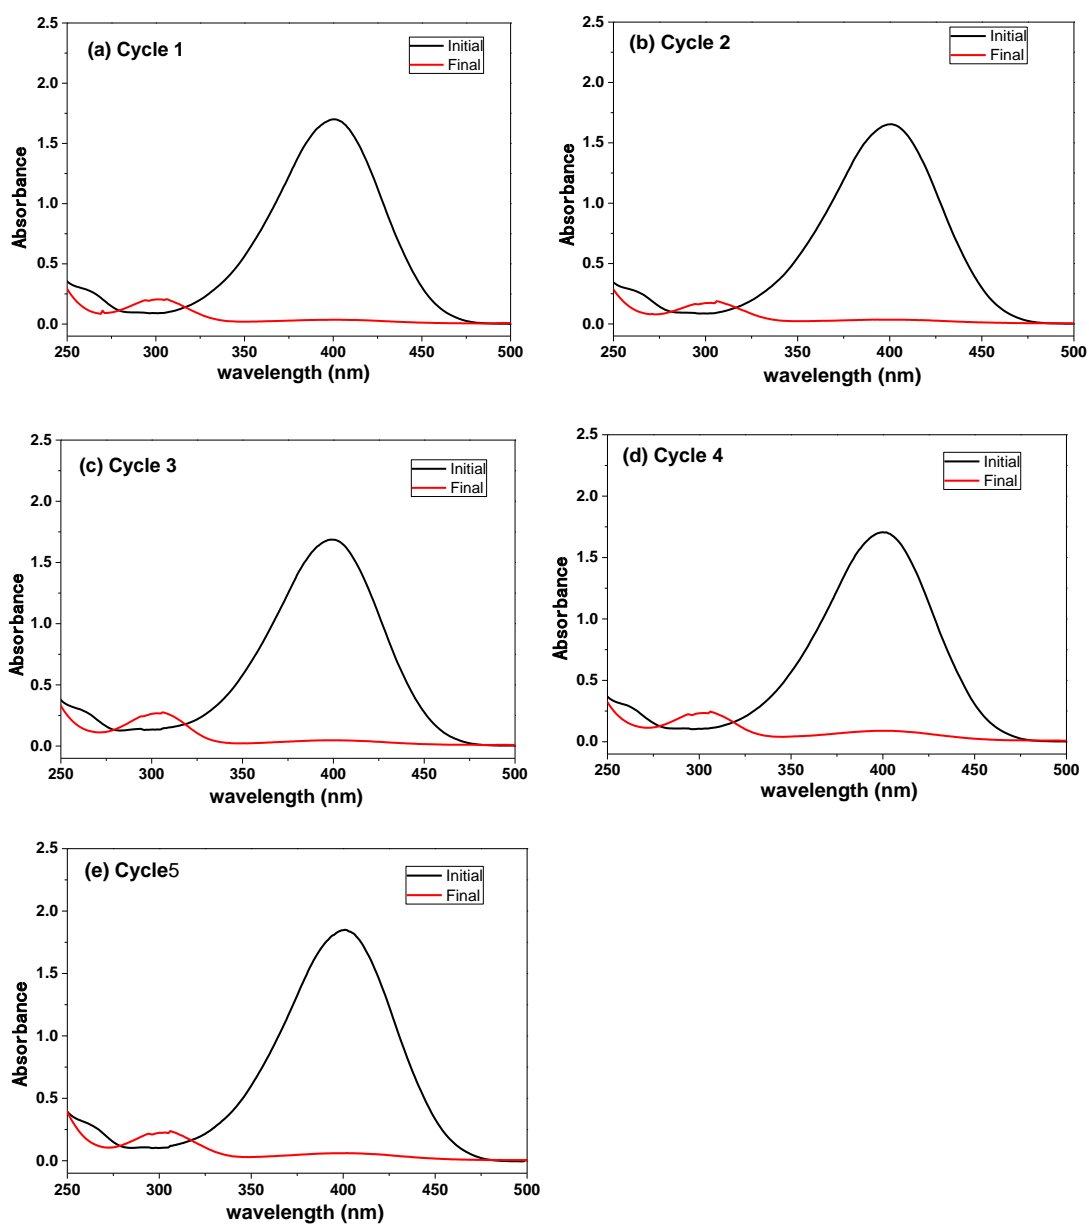

**Fig. S7.** UV-vis absorption spectra of the reduction of 4-NP in the recyclability experiments.
